# Supplementary material for: Diagnostic Tool for the Identification of Bactrocera dorsalis (Hendel) (Diptera: Tephritidae) Using Real-Time PCR
Source: MDPI journal article supplement (doi:10.3390/insects15010044), 2024-01-08
Supplement: s1 [file s1]

# Development of a diagnostic tool for the early and reproducible identification of *Bactrocera dorsalis* (Hendel) (Diptera Tephritidae) using Real-Time PCR with TaqMan probe technology

Rizzo Domenico<sup>1</sup>, Zubieta Claudia Gabriela<sup>1</sup>, Sacchetti Patrizia<sup>2</sup>, Andrea Marrucci<sup>1,4</sup>, Miele Fortuna<sup>3</sup>, Ascolese Roberta<sup>3,5</sup>, Nugnes Francesco<sup>3</sup>, Bernardo Umberto<sup>3,\*</sup>

<sup>1</sup> Laboratory of Phytopathological Diagnostics and Molecular Biology, Plant Protection Service of Tuscany, Via Ciliegiole 99, 51100 Pistoia, Italy; domenico.rizzo@regione.toscana.it; claudiagabriela.zubieta@regione.toscana.it; andrea.marrucci93@gmail.com.

<sup>2</sup> University of Florence, Department of Agriculture, Food, Environment and Forestry (DAGRI), Piazzale delle Cascine, 18, 50144 Florence (Italy); patrizia.sacchetti@unifi.it.

<sup>3</sup> Institute for Sustainable Plant Protection (IPSP) – CNR, P.le Enrico Fermi 1, 80055 Portici, Italy; roberta.ascolese@ipsp.cnr.it; fortuna.miele@ipsp.cnr.it; francesco.nugnes@ipsp.cnr.it; umberto.bernardo@ipsp.cnr.it.

<sup>4</sup> Department of Agricultural Food and Agro-Environmental Sciences, University of Pisa, Via del Borghetto 80, I-56124 Pisa (Italy); andrea.marrucci93@gmail.com.

<sup>5</sup> Department of Biology, University of Naples Federico II, Via Vicinale Cupa Cintia 21, 80126 Napoli (Italy); roberta.ascolese@unina.it.

\* Correspondence: umberto.bernardo@ipsp.cnr.it; Tel.: +3906499327823

**Figure S1.** Inclusiveness of the qPCR probe assay. Eighteen sequences from different populations of *B. dorsalis*, geographically distant, were retrieved from GenBank through alignments based on the in-silico theoretical qPCR probe amplicon.

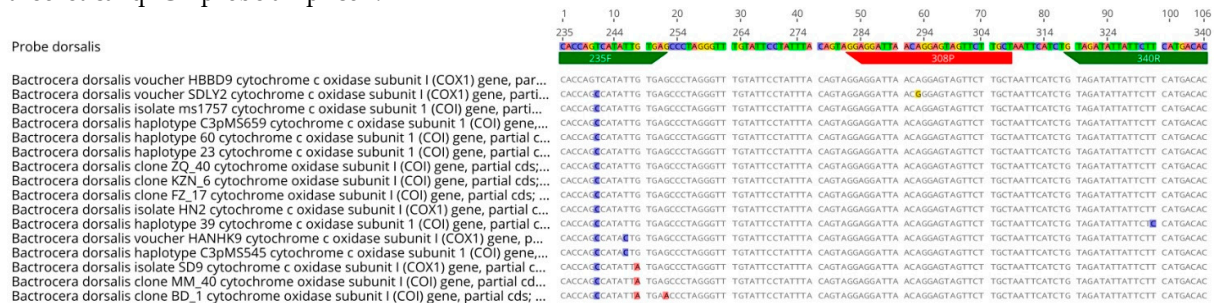



**Figure S2.** Alignments resulting from the in silico theoretical Probe amplicon and sequences of the related organisms present in GenBank. More than 200 different *Bactrocera* specimens present and detected in different source areas were compared through the sequence alignments in the network.

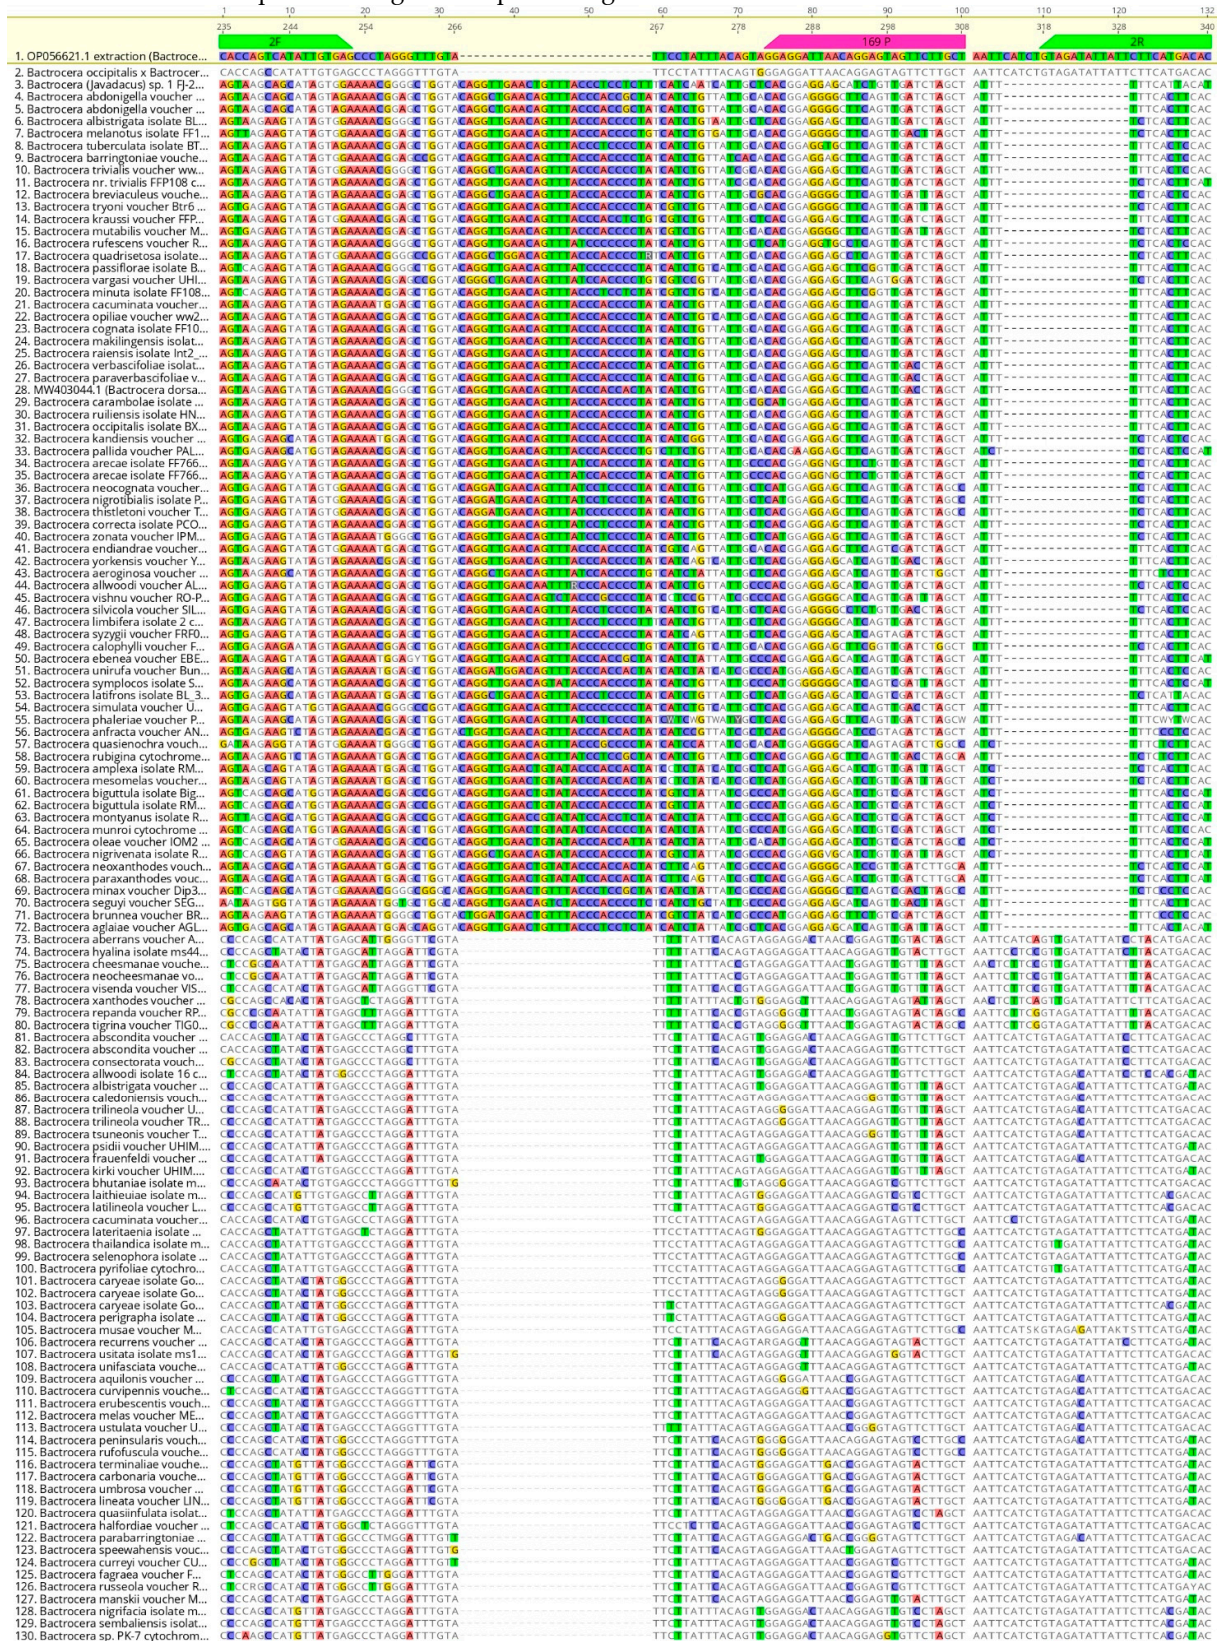



|                                           |                                 |                                        |                               |
|-------------------------------------------|---------------------------------|----------------------------------------|-------------------------------|
| 131. Bactrocera bancroftii voucher ...    | CCCCGCGCATATATGAGCCCTAGGGTTTGTG | TTTATTACAGTAGGAGGATTACGGAGTGTCTGAGCT   | AATTTCATCTGTGATATATTCTTCATGAC |
| 132. Bactrocera amambalensis isul...      | CCCCAGCATATATGAGCCCTAGGGTTTGTG  | TTTATTACAGTGGAGGATTAAACAGGAGTGTCTTGCT  | AATTCATCTGTAGATATATTCTTCATGAC |
| 133. Bactrocera dipressa isolate m...     | CCCCAGCATATATGAGCCCTAGGGTTTGTG  | TTTATTACAGTAGGAGGATTAAACAGGAGTGTCTTGCT | AATTCATCTGTAGATATATTCTTCATGAC |
| 134. Bactrocera gombakensis isolat...     | CCCCAGCATATATGAGCCCTAGGGTTTGTG  | TTTATTACAGTAGGAGGATTAAACAGGAGTGTCTTGCT | AATTCATCTGTAGATATATTCTTCATGAC |
| 135. Bactrocera lombokensis vouch...      | CCCCAGCATATATGAGCCCTAGGGTTTGTG  | TTTATTACAGTAGGAGGATTAAACAGGAGTGTCTTGCT | AATTCATCTGTGATATATTCTTCATGAC  |
| 136. Bactrocera paraearcae isolat...      | CCCCAGCATATATGAGCCCTAGGGTTTGTG  | TTTATTACAGTGGAGGATTAAACAGGAGTGTCTTGCT  | AATTCATCTGTAGATATATTCTTCATGAC |
| 137. Bactrocera apiculatus isolate...     | CCCCAGCATATATGAGCCCTAGGGTTTGTG  | TTTATTACAGTAGGAGGATTAAACAGGAGTGTCTTGCT | AATTCATCTGTAGATATATTCTTCATGAC |
| 138. Bactrocera hantanae isolate m...     | CCCCAGCATATATGAGCCCTAGGGTTTGTG  | TTTATTACAGTAGGAGGATTAAACAGGAGTGTCTTGCT | AATTCATCTGTAGATATATTCTTCATGAC |
| 139. Bactrocera quadrata voucher ...      | CCCCAGCATATATGAGCCCTAGGGTTTGTG  | TTTATTACAGTAGGAGGATTAAACAGGAGTGTCTTGCT | AATTCATCTGTAGATATATTCTTCATGAC |
| 140. Bactrocera melanothoracia v...       | CCCCAGCATATATGAGCCCTAGGGTTTGTG  | TTTATTACAGTAGGAGGATTAAACAGGAGTGTCTTGCT | AATTCATCTGTAGATATATTCTTCATGAC |
| 141. Bactrocera nr. quadrata NOD0...      | CCCCAGCATATATGAGCCCTAGGGTTTGTG  | TTTATTACAGTAGGAGGATTAAACAGGAGTGTCTTGCT | AATTCATCTGTAGATATATTCTTCATGAC |
| 142. Bactrocera paradiospyri isolat...    | CCCCAGCATATATGAGCCCTAGGGTTTGTG  | TTTATTACAGTAGGAGGATTAAACAGGAGTGTCTTGCT | AATTCATCTGTAGATATATTCTTCATGAC |
| 143. Bactrocera ochrosiae isolate ...     | CCCCAGCATATATGAGCCCTAGGGTTTGTG  | TTTATTACAGTAGGAGGATTAAACAGGAGTGTCTTGCT | AATTCATCTGTAGATATATTCTTCATGAC |
| 144. Bactrocera ceylanica isolate m...    | CCCCAGCATATATGAGCCCTAGGGTTTGTG  | TTTATTACAGTAGGAGGATTAAACAGGAGTGTCTTGCT | AATTCATCTGTAGATATATTCTTCATGAC |
| 145. Bactrocera bidentata voucher ...     | CCCCAGCATATATGAGCCCTAGGGTTTGTG  | TTTATTACAGTAGGAGGATTAAACAGGAGTGTCTTGCT | AATTCATCTGTAGATATATTCTTCATGAC |
| 146. Bactrocera decurtans voucher ...     | CCCCAGCATATATGAGCCCTAGGGTTTGTG  | TTTATTACAGTAGGAGGATTAAACAGGAGTGTCTTGCT | AATTCATCTGTAGATATATTCTTCATGAC |
| 147. Bactrocera kanchanaburi isolat...    | CCCCAGCATATATGAGCCCTAGGGTTTGTG  | TTTATTACAGTAGGAGGATTAAACAGGAGTGTCTTGCT | AATTCATCTGTAGATATATTCTTCATGAC |
| 148. Bactrocera osbeckiae voucher ...     | CCCCAGCATATATGAGCCCTAGGGTTTGTG  | TTTATTACAGTAGGAGGATTAAACAGGAGTGTCTTGCT | AATTCATCTGTAGATATATTCTTCATGAC |
| 149. Bactrocera bivittata isolate m...    | CCCCAGCATATATGAGCCCTAGGGTTTGTG  | TTTATTACAGTAGGAGGATTAAACAGGAGTGTCTTGCT | AATTCATCTGTAGATATATTCTTCATGAC |
| 150. Bactrocera medionulula isolat...     | CCCCAGCATATATGAGCCCTAGGGTTTGTG  | TTTATTACAGTAGGAGGATTAAACAGGAGTGTCTTGCT | AATTCATCTGTAGATATATTCTTCATGAC |
| 151. Bactrocera jarvisi voucher JAR...    | CCCCAGCATATATGAGCCCTAGGGTTTGTG  | TTTATTACAGTAGGAGGATTAAACAGGAGTGTCTTGCT | AATTCATCTGTAGATATATTCTTCATGAC |
| 152. Bactrocera perkinsi voucher P...     | CCCCAGCATATATGAGCCCTAGGGTTTGTG  | TTTATTACAGTAGGAGGATTAAACAGGAGTGTCTTGCT | AATTCATCTGTAGATATATTCTTCATGAC |
| 153. Bactrocera adamantea vouch...        | CCCCAGCATATATGAGCCCTAGGGTTTGTG  | TTTATTACAGTAGGAGGATTAAACAGGAGTGTCTTGCT | AATTCATCTGTAGATATATTCTTCATGAC |
| 154. Bactrocera adamantea vouch...        | CCCCAGCATATATGAGCCCTAGGGTTTGTG  | TTTATTACAGTAGGAGGATTAAACAGGAGTGTCTTGCT | AATTCATCTGTAGATATATTCTTCATGAC |
| 155. Bactrocera nigrita voucher UHL...    | CCCCAGCATATATGAGCCCTAGGGTTTGTG  | TTTATTACAGTAGGAGGATTAAACAGGAGTGTCTTGCT | AATTCATCTGTAGATATATTCTTCATGAC |
| 156. Bactrocera paramusae vouch...        | CCCCAGCATATATGAGCCCTAGGGTTTGTG  | TTTATTACAGTAGGAGGATTAAACAGGAGTGTCTTGCT | AATTCATCTGTAGATATATTCTTCATGAC |
| 157. Bactrocera fuscicornis voucher ...   | CCCCAGCATATATGAGCCCTAGGGTTTGTG  | TTTATTACAGTAGGAGGATTAAACAGGAGTGTCTTGCT | AATTCATCTGTAGATATATTCTTCATGAC |
| 158. Bactrocera propinqua voucher ...     | CCCCAGCATATATGAGCCCTAGGGTTTGTG  | TTTATTACAGTAGGAGGATTAAACAGGAGTGTCTTGCT | AATTCATCTGTAGATATATTCTTCATGAC |
| 159. Bactrocera melastomatus vouch...     | CCCCAGCATATATGAGCCCTAGGGTTTGTG  | TTTATTACAGTAGGAGGATTAAACAGGAGTGTCTTGCT | AATTCATCTGTAGATATATTCTTCATGAC |
| 160. Bactrocera wuzhishana isolate...     | CCCCAGCATATATGAGCCCTAGGGTTTGTG  | TTTATTACAGTAGGAGGATTAAACAGGAGTGTCTTGCT | AATTCATCTGTAGATATATTCTTCATGAC |
| 161. Bactrocera tinomisi voucher ...      | CCCCAGCATATATGAGCCCTAGGGTTTGTG  | TTTATTACAGTAGGAGGATTAAACAGGAGTGTCTTGCT | AATTCATCTGTAGATATATTCTTCATGAC |
| 162. Bactrocera fuscicornis voucher ...   | CCCCAGCATATATGAGCCCTAGGGTTTGTG  | TTTATTACAGTAGGAGGATTAAACAGGAGTGTCTTGCT | AATTCATCTGTAGATATATTCTTCATGAC |
| 163. Bactrocera furvilineata vouch...     | CCCCAGCATATATGAGCCCTAGGGTTTGTG  | TTTATTACAGTAGGAGGATTAAACAGGAGTGTCTTGCT | AATTCATCTGTAGATATATTCTTCATGAC |
| 164. Bactrocera dorsalisoides isolate ... | CCCCAGCATATATGAGCCCTAGGGTTTGTG  | TTTATTACAGTAGGAGGATTAAACAGGAGTGTCTTGCT | AATTCATCTGTAGATATATTCTTCATGAC |
| 165. Bactrocera laticauda voucher ...     | CCCCAGCATATATGAGCCCTAGGGTTTGTG  | TTTATTACAGTAGGAGGATTAAACAGGAGTGTCTTGCT | AATTCATCTGTAGATATATTCTTCATGAC |
| 166. Bactrocera nr. quadrata NOD0...      | CCCCAGCATATATGAGCCCTAGGGTTTGTG  | TTTATTACAGTAGGAGGATTAAACAGGAGTGTCTTGCT | AATTCATCTGTAGATATATTCTTCATGAC |
| 167. Bactrocera illiusculcellaris iso...  | CCCCAGCATATATGAGCCCTAGGGTTTGTG  | TTTATTACAGTAGGAGGATTAAACAGGAGTGTCTTGCT | AATTCATCTGTAGATATATTCTTCATGAC |
| 168. Bactrocera eurycosta isolate ...     | CCCCAGCATATATGAGCCCTAGGGTTTGTG  | TTTATTACAGTAGGAGGATTAAACAGGAGTGTCTTGCT | AATTCATCTGTAGATATATTCTTCATGAC |
| 169. Bactrocera sp. n. I MD5-2015 ...     | CCCCAGCATATATGAGCCCTAGGGTTTGTG  | TTTATTACAGTAGGAGGATTAAACAGGAGTGTCTTGCT | AATTCATCTGTAGATATATTCTTCATGAC |
| 170. Bactrocera propinqua voucher ...     | CCCCAGCATATATGAGCCCTAGGGTTTGTG  | TTTATTACAGTAGGAGGATTAAACAGGAGTGTCTTGCT | AATTCATCTGTAGATATATTCTTCATGAC |
| 171. Bactrocera amplexifera voucher ...   | CCCCAGCATATATGAGCCCTAGGGTTTGTG  | TTTATTACAGTAGGAGGATTAAACAGGAGTGTCTTGCT | AATTCATCTGTAGATATATTCTTCATGAC |
| 172. Bactrocera absidata voucher A...     | CCCCAGCATATATGAGCCCTAGGGTTTGTG  | TTTATTACAGTAGGAGGATTAAACAGGAGTGTCTTGCT | AATTCATCTGTAGATATATTCTTCATGAC |
| 173. Bactrocera aeruginosa vouch...       | CCCCAGCATATATGAGCCCTAGGGTTTGTG  | TTTATTACAGTAGGAGGATTAAACAGGAGTGTCTTGCT | AATTCATCTGTAGATATATTCTTCATGAC |
| 174. Bactrocera alysiac voucher AL...     | CCCCAGCATATATGAGCCCTAGGGTTTGTG  | TTTATTACAGTAGGAGGATTAAACAGGAGTGTCTTGCT | AATTCATCTGTAGATATATTCTTCATGAC |
| 175. Bactrocera batemani voucher ...      | CCCCAGCATATATGAGCCCTAGGGTTTGTG  | TTTATTACAGTAGGAGGATTAAACAGGAGTGTCTTGCT | AATTCATCTGTAGATATATTCTTCATGAC |
| 176. Bactrocera antigone voucher A...     | CCCCAGCATATATGAGCCCTAGGGTTTGTG  | TTTATTACAGTAGGAGGATTAAACAGGAGTGTCTTGCT | AATTCATCTGTAGATATATTCTTCATGAC |
| 177. Bactrocera dongnaiensis isolate ...  | CCCCAGCATATATGAGCCCTAGGGTTTGTG  | TTTATTACAGTAGGAGGATTAAACAGGAGTGTCTTGCT | AATTCATCTGTAGATATATTCTTCATGAC |
| 178. Bactrocera moluccensis vouch...      | CCCCAGCATATATGAGCCCTAGGGTTTGTG  | TTTATTACAGTAGGAGGATTAAACAGGAGTGTCTTGCT | AATTCATCTGTAGATATATTCTTCATGAC |
| 179. Bactrocera aethiopsidis isolat...    | CCCCAGCATATATGAGCCCTAGGGTTTGTG  | TTTATTACAGTAGGAGGATTAAACAGGAGTGTCTTGCT | AATTCATCTGTAGATATATTCTTCATGAC |
| 180. Bactrocera facialis voucher FA...    | CCCCAGCATATATGAGCCCTAGGGTTTGTG  | TTTATTACAGTAGGAGGATTAAACAGGAGTGTCTTGCT | AATTCATCTGTAGATATATTCTTCATGAC |
| 181. Bactrocera mucronis voucher ...      | CCCCAGCATATATGAGCCCTAGGGTTTGTG  | TTTATTACAGTAGGAGGATTAAACAGGAGTGTCTTGCT | AATTCATCTGTAGATATATTCTTCATGAC |
| 182. Bactrocera peneobscura vouch...      | CCCCAGCATATATGAGCCCTAGGGTTTGTG  | TTTATTACAGTAGGAGGATTAAACAGGAGTGTCTTGCT | AATTCATCTGTAGATATATTCTTCATGAC |
| 183. Bactrocera aurantiaca voucher...     | CCCCAGCATATATGAGCCCTAGGGTTTGTG  | TTTATTACAGTAGGAGGATTAAACAGGAGTGTCTTGCT | AATTCATCTGTAGATATATTCTTCATGAC |
| 184. Bactrocera morioensis vouch...       | CCCCAGCATATATGAGCCCTAGGGTTTGTG  | TTTATTACAGTAGGAGGATTAAACAGGAGTGTCTTGCT | AATTCATCTGTAGATATATTCTTCATGAC |
| 185. Bactrocera tsatsia voucher UHL...    | CCCCAGCATATATGAGCCCTAGGGTTTGTG  | TTTATTACAGTAGGAGGATTAAACAGGAGTGTCTTGCT | AATTCATCTGTAGATATATTCTTCATGAC |
| 186. Bactrocera albidistincta vouch...    | CCCCAGCATATATGAGCCCTAGGGTTTGTG  | TTTATTACAGTAGGAGGATTAAACAGGAGTGTCTTGCT | AATTCATCTGTAGATATATTCTTCATGAC |
| 187. Bactrocera distincta voucher D...    | CCCCAGCATATATGAGCCCTAGGGTTTGTG  | TTTATTACAGTAGGAGGATTAAACAGGAGTGTCTTGCT | AATTCATCTGTAGATATATTCTTCATGAC |
| 188. Bactrocera unitaeniola vouch...      | CCCCAGCATATATGAGCCCTAGGGTTTGTG  | TTTATTACAGTAGGAGGATTAAACAGGAGTGTCTTGCT | AATTCATCTGTAGATATATTCTTCATGAC |
| 189. Bactrocera tapahensis vouch...       | CCCCAGCATATATGAGCCCTAGGGTTTGTG  | TTTATTACAGTAGGAGGATTAAACAGGAGTGTCTTGCT | AATTCATCTGTAGATATATTCTTCATGAC |
| 190. Bactrocera curvifera voucher ...     | CCCCAGCATATATGAGCCCTAGGGTTTGTG  | TTTATTACAGTAGGAGGATTAAACAGGAGTGTCTTGCT | AATTCATCTGTAGATATATTCTTCATGAC |
| 191. Bactrocera resimae voucher RE...     | CCCCAGCATATATGAGCCCTAGGGTTTGTG  | TTTATTACAGTAGGAGGATTAAACAGGAGTGTCTTGCT | AATTCATCTGTAGATATATTCTTCATGAC |
| 192. Bactrocera tenuifascia vouch...      | CCCCAGCATATATGAGCCCTAGGGTTTGTG  | TTTATTACAGTAGGAGGATTAAACAGGAGTGTCTTGCT | AATTCATCTGTAGATATATTCTTCATGAC |
| 193. Bactrocera fulvicauda voucher ...    | CCCCAGCATATATGAGCCCTAGGGTTTGTG  | TTTATTACAGTAGGAGGATTAAACAGGAGTGTCTTGCT | AATTCATCTGTAGATATATTCTTCATGAC |
| 194. Bactrocera reduna voucher AEA...     | CCCCAGCATATATGAGCCCTAGGGTTTGTG  | TTTATTACAGTAGGAGGATTAAACAGGAGTGTCTTGCT | AATTCATCTGTAGATATATTCTTCATGAC |
| 195. Bactrocera resima voucher RE...      | CCCCAGCATATATGAGCCCTAGGGTTTGTG  | TTTATTACAGTAGGAGGATTAAACAGGAGTGTCTTGCT | AATTCATCTGTAGATATATTCTTCATGAC |
| 196. Bactrocera romigae voucher R...      | CCCCAGCATATATGAGCCCTAGGGTTTGTG  | TTTATTACAGTAGGAGGATTAAACAGGAGTGTCTTGCT | AATTCATCTGTAGATATATTCTTCATGAC |
| 197. Bactrocera murrayi voucher M...      | CCCCAGCATATATGAGCCCTAGGGTTTGTG  | TTTATTACAGTAGGAGGATTAAACAGGAGTGTCTTGCT | AATTCATCTGTAGATATATTCTTCATGAC |
| 198. Bactrocera aurea voucher AEA...      | CCCCAGCATATATGAGCCCTAGGGTTTGTG  | TTTATTACAGTAGGAGGATTAAACAGGAGTGTCTTGCT | AATTCATCTGTAGATATATTCTTCATGAC |
| 199. Bactrocera clarifemur voucher...     | CCCCAGCATATATGAGCCCTAGGGTTTGTG  | TTTATTACAGTAGGAGGATTAAACAGGAGTGTCTTGCT | AATTCATCTGTAGATATATTCTTCATGAC |
| 200. Bactrocera nigra voucher NIG0...     | CCCCAGCATATATGAGCCCTAGGGTTTGTG  | TTTATTACAGTAGGAGGATTAAACAGGAGTGTCTTGCT | AATTCATCTGTAGATATATTCTTCATGAC |
| 201. Bactrocera trilineata isolate m...   | CCCCAGCATATATGAGCCCTAGGGTTTGTG  | TTTATTACAGTAGGAGGATTAAACAGGAGTGTCTTGCT | AATTCATCTGTAGATATATTCTTCATGAC |
| 202. Bactrocera trigrescens vouch...      | CCCCAGCATATATGAGCCCTAGGGTTTGTG  | TTTATTACAGTAGGAGGATTAAACAGGAGTGTCTTGCT | AATTCATCTGTAGATATATTCTTCATGAC |
| 203. Bactrocera lempalis voucher ...      | CCCCAGCATATATGAGCCCTAGGGTTTGTG  | TTTATTACAGTAGGAGGATTAAACAGGAGTGTCTTGCT | AATTCATCTGTAGATATATTCTTCATGAC |
| 204. Bactrocera ernesti voucher UHL...    | CCCCAGCATATATGAGCCCTAGGGTTTGTG  | TTTATTACAGTAGGAGGATTAAACAGGAGTGTCTTGCT | AATTCATCTGTAGATATATTCTTCATGAC |
| 205. Bactrocera continua isolate m...     | CCCCAGCATATATGAGCCCTAGGGTTTGTG  | TTTATTACAGTAGGAGGATTAAACAGGAGTGTCTTGCT | AATTCATCTGTAGATATATTCTTCATGAC |
| 206. Bactrocera geminimulata vo...        | CCCCAGCATATATGAGCCCTAGGGTTTGTG  | TTTATTACAGTAGGAGGATTAAACAGGAGTGTCTTGCT | AATTCATCTGTAGATATATTCTTCATGAC |
| 207. Bactrocera absidata voucher A...     | CCCCAGCATATATGAGCCCTAGGGTTTGTG  | TTTATTACAGTAGGAGGATTAAACAGGAGTGTCTTGCT | AATTCATCTGTAGATATATTCTTCATGAC |
| 208. Bactrocera mayi voucher DMV...       | CCCCAGCATATATGAGCCCTAGGGTTTGTG  | TTTATTACAGTAGGAGGATTAAACAGGAGTGTCTTGCT | AATTCATCTGTAGATATATTCTTCATGAC |
| 209. Bactrocera connecta voucher ...      | CCCCAGCATATATGAGCCCTAGGGTTTGTG  | TTTATTACAGTAGGAGGATTAAACAGGAGTGTCTTGCT | AATTCATCTGTAGATATATTCTTCATGAC |
| 210. Bactrocera visenda NADH de...        | CCCCAGCATATATGAGCCCTAGGGTTTGTG  | TTTATTACAGTAGGAGGATTAAACAGGAGTGTCTTGCT | AATTCATCTGTAGATATATTCTTCATGAC |
| 211. Bactrocera brunnea voucher B...      | CCCCAGCATATATGAGCCCTAGGGTTTGTG  | TTTATTACAGTAGGAGGATTAAACAGGAGTGTCTTGCT | AATTCATCTGTAGATATATTCTTCATGAC |
| 212. Bactrocera dyscrita voucher D...     | CCCCAGCATATATGAGCCCTAGGGTTTGTG  | TTTATTACAGTAGGAGGATTAAACAGGAGTGTCTTGCT | AATTCATCTGTAGATATATTCTTCATGAC |
| 213. Bactrocera endorha voucher B...      | CCCCAGCATATATGAGCCCTAGGGTTTGTG  | TTTATTACAGTAGGAGGATTAAACAGGAGTGTCTTGCT | AATTCATCTGTAGATATATTCTTCATGAC |
| 214. Bactrocera unistriata voucher ...    | CCCCAGCATATATGAGCCCTAGGGTTTGTG  | TTTATTACAGTAGGAGGATTAAACAGGAGTGTCTTGCT | AATTCATCTGTAGATATATTCTTCATGAC |
| 215. Bactrocera speculifera vouch...      | CCCCAGCATATATGAGCCCTAGGGTTTGTG  | TTTATTACAGTAGGAGGATTAAACAGGAGTGTCTTGCT | AATTCATCTGTAGATATATTCTTCATGAC |

**Table S1.** Target and non-target list with indication of Cqs detected in single gene amplification reactions with the qPCR probe

| Species                                         | Sample code | Concentration | Cq  |
|-------------------------------------------------|-------------|---------------|-----|
| <i>Anastrepha fraterculus</i> (Wiedemann, 1830) | MR 000752   | 10 ng/μL      | n/a |
|                                                 | MR 000795   | 10 ng/μL      | n/a |
| <i>Anastrepha leptozona</i> Hendel 1914         | MR 000817   | 10 ng/μL      | n/a |
|                                                 | MR 000823   | 10 ng/μL      | n/a |
|                                                 | MR 001658   | 10 ng/μL      | n/a |
|                                                 | MR 000753   | 10 ng/μL      | n/a |
| <i>Anastrepha ludens</i> (Loew, 1873)           | MR 000820   | 10 ng/μL      | n/a |
|                                                 | MR 001659   | 10 ng/μL      | n/a |
|                                                 | MR 001710   | 10 ng/μL      | n/a |
|                                                 | MR 001721   | 10 ng/μL      | n/a |
| <i>Anastrepha obliqua</i> (Macquart, 1835)      | MR 000821   | 10 ng/μL      | n/a |
|                                                 | MR 001715   | 10 ng/μL      | n/a |
| <i>Anastrepha serpentina</i> (Wiedemann, 1830)  | MR 000283   | 10 ng/μL      | n/a |
|                                                 | MR 000822   | 10 ng/μL      | n/a |

|                                                 |           |          |       |
|-------------------------------------------------|-----------|----------|-------|
|                                                 | MR 001701 | 10 ng/μL | n/a   |
|                                                 | MR 001689 | 10 ng/μL | n/a   |
|                                                 | MR 001722 | 10 ng/μL | n/a   |
| <i>Bactrocera dorsalis</i> (Hendel, 1912)       | MR 001712 | 10 ng/μL | 22.78 |
|                                                 | MR 001720 | 10 ng/μL | 21.36 |
|                                                 | MR 001709 | 10 ng/μL | 21.40 |
|                                                 | MR 001718 | 10 ng/μL | 21.26 |
|                                                 | MR 001716 | 10 ng/μL | 21.16 |
|                                                 | MR 000814 | 10 ng/μL | 21.12 |
|                                                 | MR 001563 | 10 ng/μL | 20.98 |
|                                                 | MR 001713 | 10 ng/μL | 21.10 |
|                                                 | MR 001638 | 10 ng/μL | 20.87 |
|                                                 | MR 001714 | 10 ng/μL | 21.45 |
|                                                 | MR 001717 | 10 ng/μL | 21.08 |
|                                                 | MR 001711 | 10 ng/μL | 17.56 |
|                                                 | MR 001719 | 10 ng/μL | 16.52 |
|                                                 | MR 000801 | 10 ng/μL | 17.24 |
|                                                 | MR 001683 | 10 ng/μL | 16.87 |
|                                                 | MR 001684 | 10 ng/μL | 17.45 |
|                                                 | MR 000239 | 10 ng/μL | 17.25 |
|                                                 | MR 001697 | 10 ng/μL | 16.98 |
|                                                 | MR 001747 | 10 ng/μL | 17.28 |
|                                                 | MR 000764 | 10 ng/μL | 17.19 |
| <i>Bactrocera latifrons</i> (Hendel, 1915)      | MR 000752 | 10 ng/μL | n/a   |
|                                                 | MR 000823 | 10 ng/μL | n/a   |
| <i>Bactrocera oleae</i> (Rossi, 1790)           | MR 001658 | 10 ng/μL | n/a   |
| <i>Bactrocera zonata</i> (Saunders, 1842)       | MR 000753 | 10 ng/μL | n/a   |
| <i>Ceratitis capitata</i> (Wiedemann, 1824)     | MR 000820 | 10 ng/μL | n/a   |
|                                                 | MR 000821 | 10 ng/μL | n/a   |
|                                                 | MR 000283 | 10 ng/μL | n/a   |
|                                                 | MR 000822 | 10 ng/μL | n/a   |
| <i>Cydia pomonella</i> (Linnaeus, 1758)         | MR 000259 | 10 ng/μL | n/a   |
|                                                 | MR 000790 | 10 ng/μL | n/a   |
| <i>Grapholita molesta</i> (Busck, 1916)         | MR 001617 | 10 ng/μL | n/a   |
| <i>Rhagoletis cerasi</i> (Linnaeus, 1758)       | MR 001618 | 10 ng/μL | n/a   |
| <i>Rhagoletis completa</i> (Cresson, 1929)      | MR 001648 | 10 ng/μL | n/a   |
|                                                 | MR 001619 | 10 ng/μL | n/a   |
| <i>Thaumatotibia leucotreta</i> (Meyrick, 1913) | MR 001678 | 10 ng/μL | n/a   |
|                                                 | MR 001620 | 10 ng/μL | n/a   |
|                                                 | MR 001621 | 10 ng/μL | n/a   |
